# Supplementary material for: Health professionals' perspective on the promotion of e-mental health apps in the context of maternal depression
Source: PubMed Central journal article supplement (PMC5507525; doi:10.1371/journal.pone.0180867), 2017-07-12
Supplement: pone.0180867.s001.pdf [file pone.0180867.s001.pdf]

# S1 Appendix – Questionnaire

## Demographics

Age \_\_\_\_\_

Job title \_\_\_\_\_

Years of practicing \_\_\_\_\_

## Role of technology in your work setting

Please answer the following questions on a scale from 1 (not at all) to 5 (extremely often/useful)

|                                                | Not at all (1) – Extremely often/useful (5) |
|------------------------------------------------|---------------------------------------------|
| How often do you use technology for your work? | ① ② ③ ④ ⑤                                   |
| How useful is technology for your work?        | ① ② ③ ④ ⑤                                   |
| How much does technology improve your work?    | ① ② ③ ④ ⑤                                   |

## Knowledge regarding maternal depression

Please answer the following questions on a scale from 1 (no knowledge) to 5 (substantial knowledge)

|                                                                                     | No knowledge (1) – Substantial knowledge (5) |
|-------------------------------------------------------------------------------------|----------------------------------------------|
| Do you have knowledge about the symptomatology of maternal depression?              | ① ② ③ ④ ⑤                                    |
| Do you have knowledge of the factors that increase the risk of maternal depression? | ① ② ③ ④ ⑤                                    |

## Questions regarding an e-mental health app for maternal depression

On a scale from 1 (strongly disagree) to 5 (strongly agree), what is your level of agreement with the following statements?

| Statements                                                                                                            | Strongly disagree (1) - Strongly agree (5) |
|-----------------------------------------------------------------------------------------------------------------------|--------------------------------------------|
| In terms of cost-benefit, it is beneficial to use e-mental health applications in the context of maternal depression. | ① ② ③ ④ ⑤                                  |
| E-mental health applications would be useful in the context of maternal depression.                                   | ① ② ③ ④ ⑤                                  |
| Using e-mental health applications in the context of maternal depression is in general a good idea.                   | ① ② ③ ④ ⑤                                  |

|                                                                                                                                                                                |           |
|--------------------------------------------------------------------------------------------------------------------------------------------------------------------------------|-----------|
| People who influence my clinical behavior think that I should recommend and use e-mental health applications in the context of maternal depression.                            | ① ② ③ ④ ⑤ |
| People who are important in the selection of my healthcare services think that I should recommend and use e-mental health applications in the context of maternal depression.  | ① ② ③ ④ ⑤ |
| People who are important in assessing my patient care and management think that I should recommend and use e-mental health applications in the context of maternal depression. | ① ② ③ ④ ⑤ |
| I would have the ability to recommend and use e-mental health applications in the context of maternal depression.                                                              | ① ② ③ ④ ⑤ |
| Recommending and using e-mental health applications in the context of maternal depression would be totally in my control.                                                      | ① ② ③ ④ ⑤ |
| I would have the knowledge to recommend and use e-mental health applications in the context of maternal depression.                                                            | ① ② ③ ④ ⑤ |
| I would be willing to inform pregnant women / new mothers I attend of e-mental health applications and their utility.                                                          | ① ② ③ ④ ⑤ |
| Whenever possible I intend to recommend and use e-mental health applications in the context of maternal depression.                                                            | ① ② ③ ④ ⑤ |
| I would recommend and use e-mental health applications in the context of maternal depression.                                                                                  | ① ② ③ ④ ⑤ |

**Based on the presented general mental healthcare process, how useful would you find e-mental health applications regarding maternal depression for the following steps of this process?**

| Steps of the general mental healthcare process | Not at all useful (1) – extremely useful (5) |
|------------------------------------------------|----------------------------------------------|
| Screening                                      | ① ② ③ ④ ⑤                                    |
| Positive psychology intervention               | ① ② ③ ④ ⑤                                    |
| Assessment and diagnosis                       | ① ② ③ ④ ⑤                                    |
| Prevention program                             | ① ② ③ ④ ⑤                                    |
| Treatment program                              | ① ② ③ ④ ⑤                                    |
| Follow-up                                      | ① ② ③ ④ ⑤                                    |
